# Supplementary material
Source: PubMed Central journal article supplement (PMC11073013)
Supplement: 18_2020_3607_MOESM1_ESM.pdf [file 18_2020_3607_MOESM1_ESM.pdf]

## Supplemental materials

### **NSun2 Regulates Aneurysm Formation by Promoting Autotaxin Expression and T Cell Recruitment**

**Yutong Miao<sup>1#</sup>, Yang Zhao<sup>2#</sup>, Lulu Han<sup>1</sup>, Xiaolong Ma<sup>1</sup>, Jiacheng Deng<sup>3</sup>, Juan Yang<sup>1</sup>, Silin Lü<sup>4</sup>, Fangyu Shao<sup>1</sup>, Wei Kong<sup>1</sup>, Wengong Wang<sup>5</sup>, Qingbo Xu<sup>3</sup>, Xian Wang<sup>1\*</sup>, Juan Feng<sup>1\*</sup>**

<sup>1</sup>Department of Physiology and Pathophysiology, School of Basic Medical Sciences, Peking University, Key Laboratory of Molecular Cardiovascular Science, Ministry of Education, Beijing, P. R. China

<sup>2</sup>Department of Laboratory Medicine, Peking University Third Hospital, Beijing, P. R. China

<sup>3</sup>Cardiovascular Division, BHF Center for Vascular Regeneration, King's College London, London, UK

<sup>4</sup>State Key Laboratory of Bioactive Substances and Function of Natural Medicine, Institute of Materia Medica, Peking Union Medical College, Chinese Academy of Medical Sciences, Beijing, P. R. China

<sup>5</sup>Department of Biochemistry and Molecular Biology, School of Basic Medical Sciences, Peking University, Beijing, P. R. China

# These authors contributed equally to this article.

\*Corresponding authors are Juan Feng and Xian Wang.

Supplemental Figures

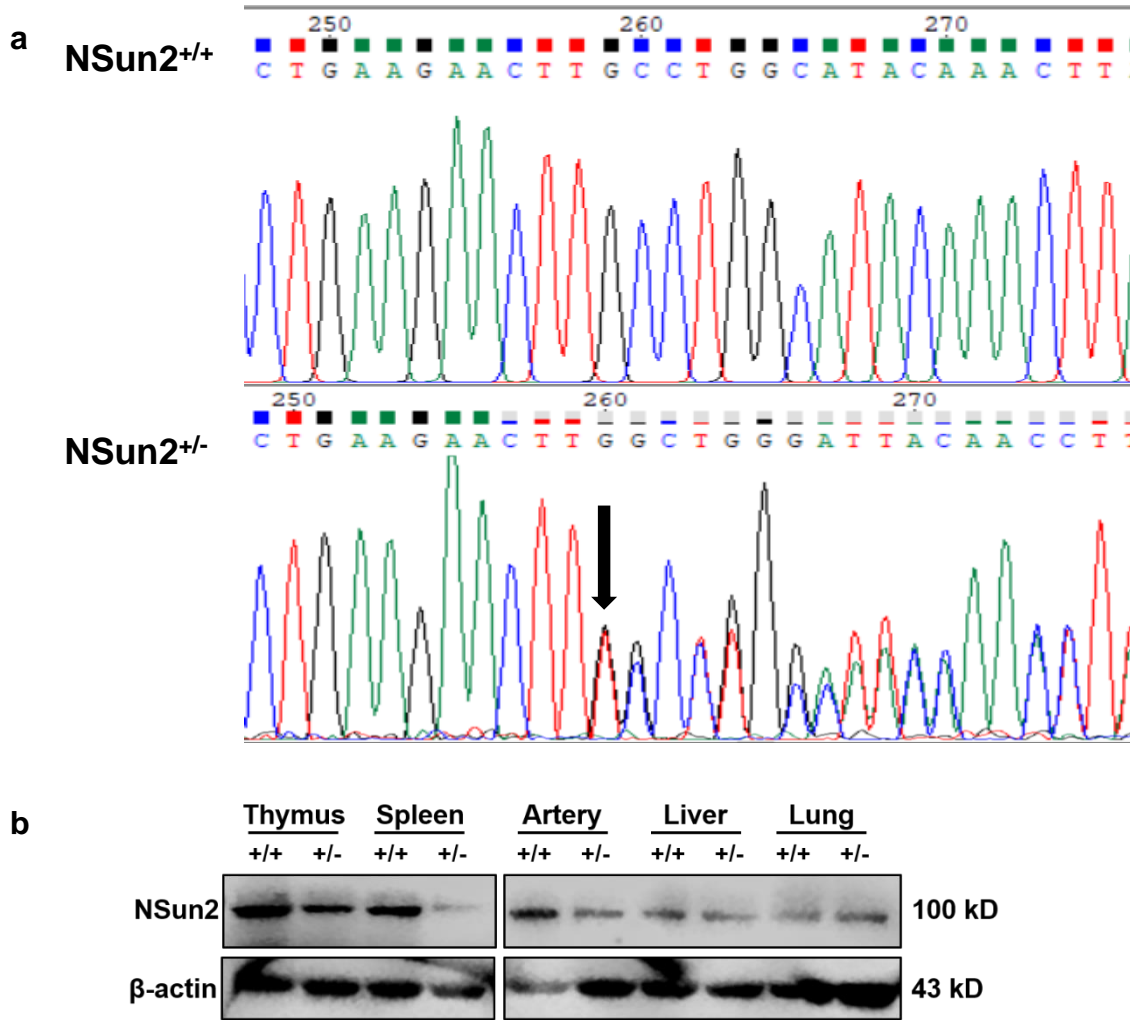

**Fig. S1** Validation of NSun2<sup>+/-</sup> mice. **a** DNA sequence analysis was performed to confirm the deletion of NSun2 in the NSun2<sup>+/-</sup> mice. The deleted nucleotides are indicated. **b** Representative Western blot analysis of NSun2 expression in various tissues from WT and NSun2<sup>+/-</sup> mice.

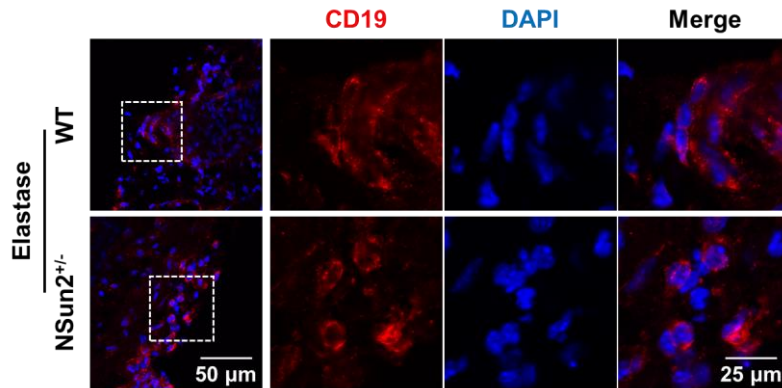

**Fig. S2** NSun2 deficiency does not affect the recruitment of B cells to the aortic wall during AAA formation. Infrarenal abdominal aortas of 10- to 11-week-old WT and NSun2<sup>+/-</sup> mice were treated with saline or elastase to induce abdominal aortic aneurysm. Representative immunofluorescent staining of B cells (CD19) in infrarenal abdominal aortas. Scale bar, 25 μm.

## Supplemental Figures

a

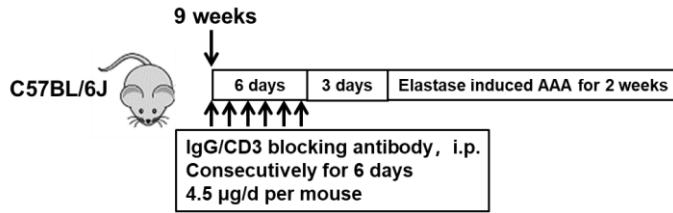

b

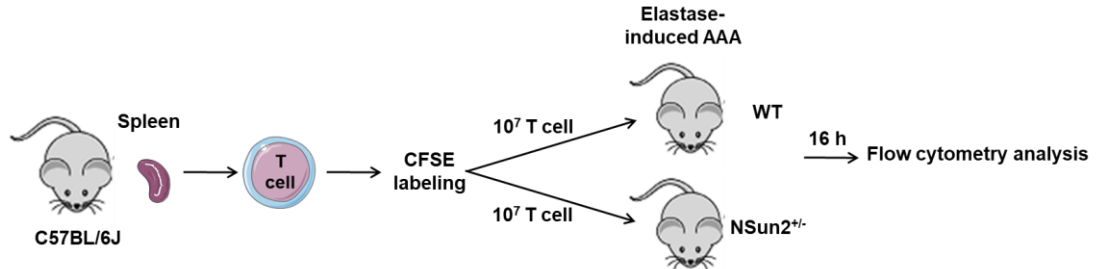

**Fig. S3** Schematic protocols in Fig. 2. **a** Recipient C57BL/6J mice were intraperitoneally injected with anti-CD3 $\epsilon$  F(ab')<sub>2</sub> fragments or IgG isotype for six consecutive days, followed by an AAA-inducing operation. **b** CD3<sup>+</sup> T cells from WT mice were labeled with CFSE. A total of 10<sup>7</sup> labeled cells were intravenously injected into one recipient WT or NSun2<sup>+/-</sup> mouse whose infrarenal abdominal aorta had been treated with elastase for 3 days. Sixteen hours later, the aortas were digested into single cells and the proportions of donor cells in infrarenal abdominal were measured by flow cytometry.

## Supplemental Figures

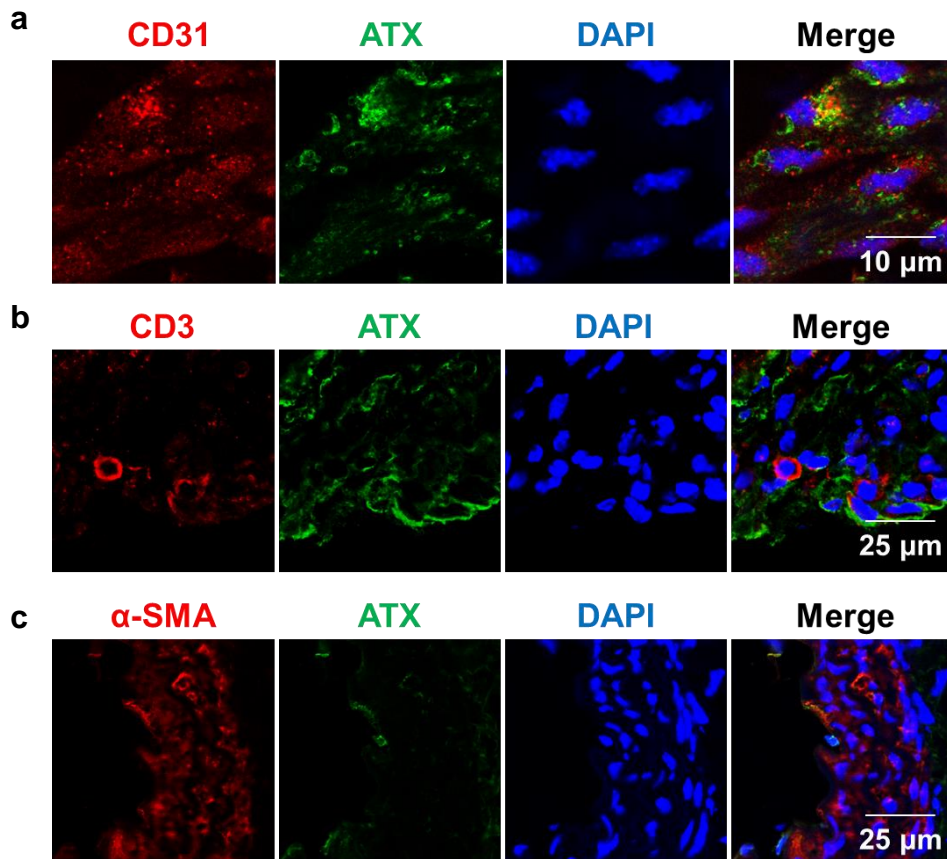

**Fig. S4** T cells and smooth muscle cells do not express ATX in elastase-induced AAA. Infrarenal abdominal aortas of 10- to 11-week-old WT mice were treated with elastase to induce abdominal aortic aneurysm. **a** Representative immunofluorescent *enface* staining of ATX expression in the endothelial layer of infrarenal abdominal aortas. Scale bar, 10  $\mu\text{m}$ . **b-c** Representative immunofluorescent staining of ATX expression in T cells (CD3; **b**) and SMC ( $\alpha$ -SMA; **c**) in infrarenal abdominal aortas. Scale bar, 25  $\mu\text{m}$ .

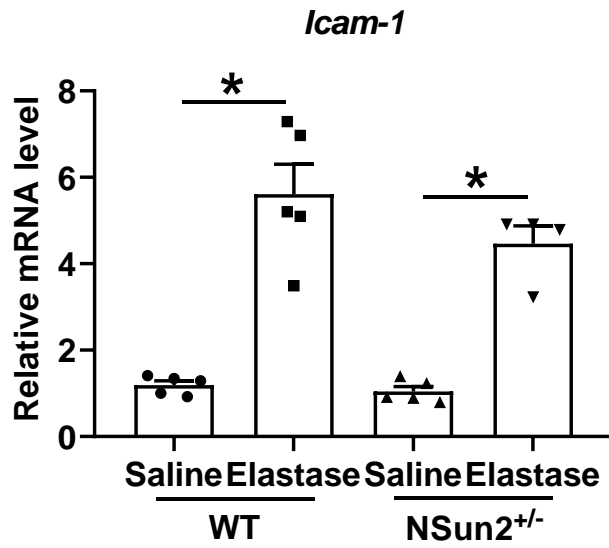

**Fig. S5** ICAM-1 expression is upregulated in AAA model. Real-time PCR quantification of mRNA levels of *Icam-1* in of infrarenal abdominal aortas (n=4-5). Data shown are mean  $\pm$  SEM. \* $P$ <0.05, by two-way ANOVA followed by Tukey's test for multiple comparisons.

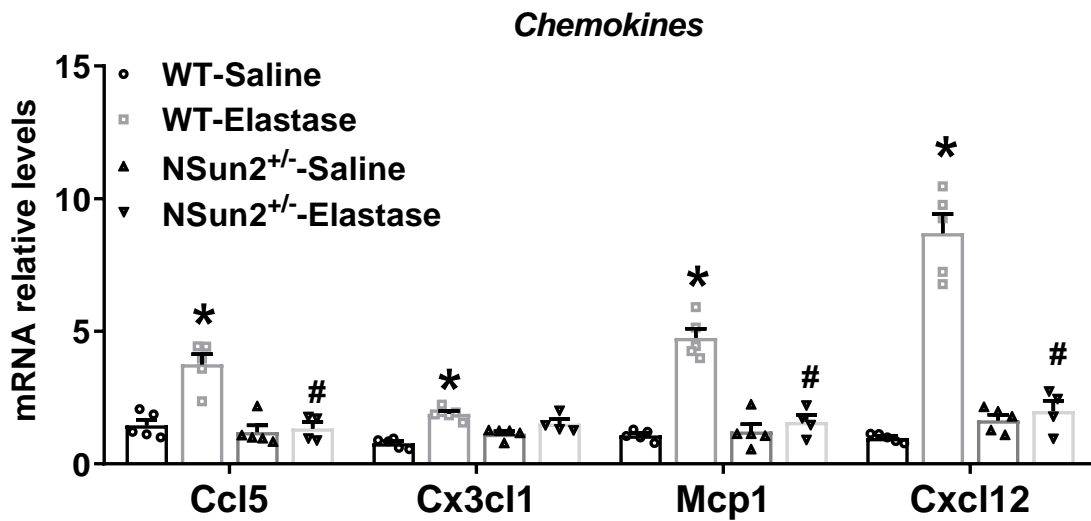

**Fig. S6** NSun2 deficiency inhibits the chemokines expression in AAA model. Real-time PCR quantification of mRNA levels of Ccl5, Cx3cl1, Mcp-1 and Cxcl12 in of infrarenal abdominal aortas (n=4-5). Data shown are mean  $\pm$  SEM. \* $P$ <0.05, compared with WT-Saline, # $P$ <0.05, compared with WT-Elastase, by two-way ANOVA followed by Tukey's test for multiple comparisons.

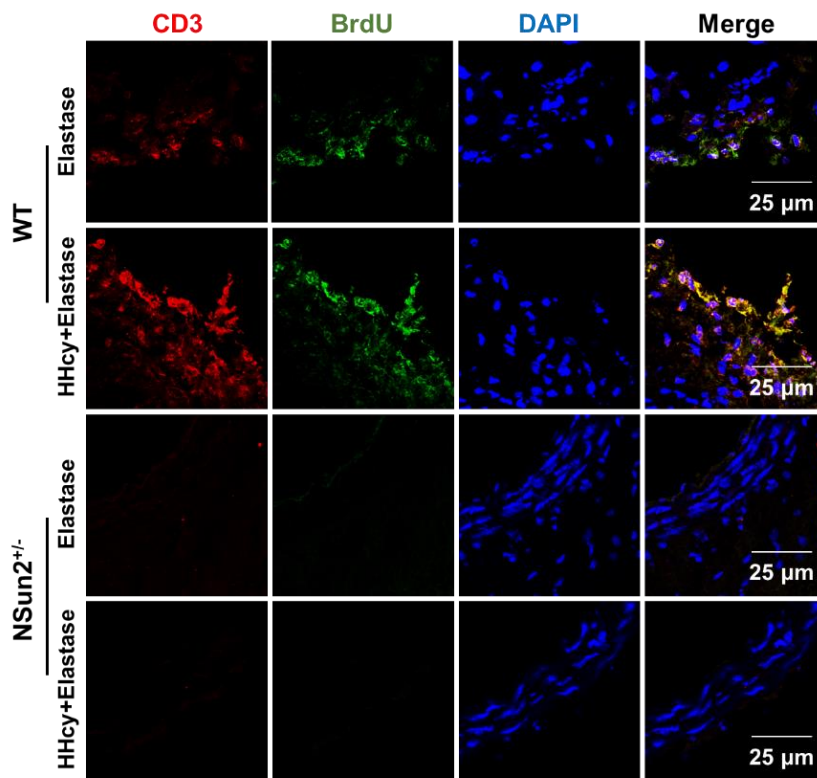

**Fig. S7** NSun2 deficiency inhibits HHcy-increased T cell proliferation in AAA lesions. Infrarenal abdominal aortas of 10- to 11-week-old WT and NSun2<sup>+/-</sup> mice were treated with elastase to induce abdominal aortic aneurysm after the mice were fed a normal chow diet and given drinking water supplemented with or without 1.8 g/L Hcy for 2 weeks. Representative immunofluorescent staining of CD3 and BrdU in infrarenal abdominal aortas. Scale bar, 25 μm.



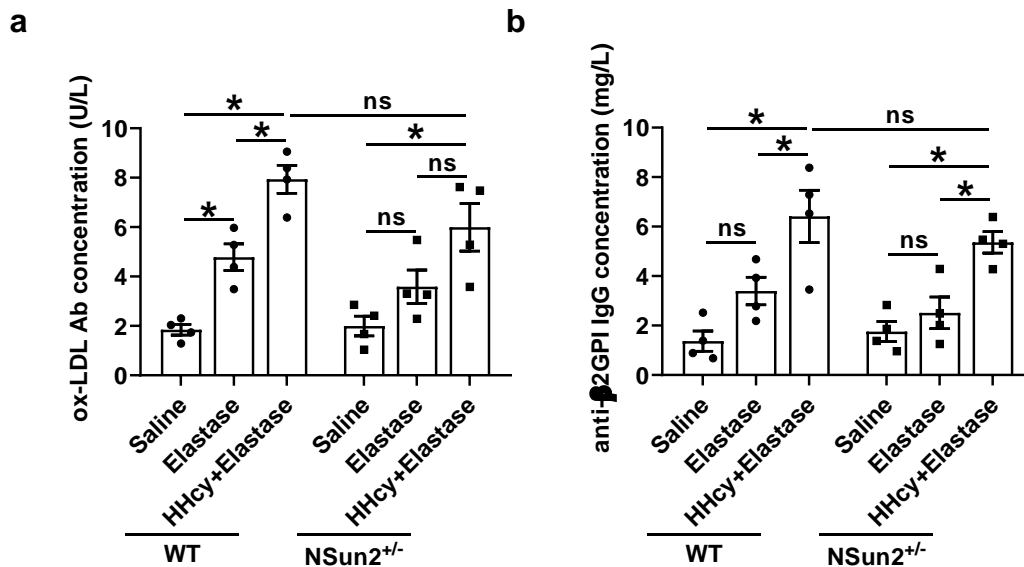

**Fig. S8** HHcy increases autoantibody production in AAA model. Infrarenal abdominal aortas of 10- to 11-week-old WT and NSun2<sup>+/-</sup> mice were treated with elastase to induce abdominal aortic aneurysm after the mice were fed a normal chow diet and given drinking water supplemented with or without 1.8 g/L Hcy for 2 weeks. Plasma ox-LDL IgG (**a**) and anti-β2GPI IgG (**b**) levels were measured via ELISA (n=4). Data shown are mean ± SEM. \**P*<0.05, by two-way ANOVA followed by Tukey's test for multiple comparisons (**a**, **b**). ns, no significance.

Table S1. Baseline characteristics of the patients.

|                            | Nonhyperhomocysteinemia | Hyperhomocysteinemia |
|----------------------------|-------------------------|----------------------|
| Sex (Male/Female)          | 13/11                   | 26/6                 |
| Age (years)                | 45.78 ± 2.18            | 46.16 ± 2.82         |
| BMI (kg/m <sup>2</sup> )   | 24.10 ± 0.79            | 25.19 ± 0.57         |
| Systolic BP (mmHg)         | 125.79 ± 3.69           | 133.90 ± 3.29        |
| Diastolic BP (mmHg)        | 75.00 ± 2.91            | 76.30 ± 1.43         |
| Homocysteine (μmol/L)      | 9.74 ± 0.57             | 26.55 ± 1.84 *       |
| Total cholesterol (mmol/L) | 4.79 ± 0.17             | 4.67 ± 0.15          |
| Triglycerides (mmol/L)     | 1.34 ± 0.19             | 1.84 ± 0.31          |
| HDL cholesterol (mmol/L)   | 1.32 ± 0.07             | 1.19 ± 0.04          |
| LDL cholesterol (mmol/L)   | 3.05 ± 0.15             | 2.89 ± 0.13          |

Data shown are mean ± SEM. \**P*<0.05, by unpaired Student *t* test.

Table S2. Primers for RT-PCR.

| Primer name   | Sequence                                                                         |
|---------------|----------------------------------------------------------------------------------|
| mus-β-actin   | forward, 5'-GTGACGTTGACATCCGTAAG-3';<br>reverse, 5'-GCCGGACTCATCGTACTCC-3'       |
| mus-Enpp2     | forward, 5'-TCCTCCCTATCTGAGCTTTC-3';<br>reverse, 5'-GGTGATGATGCTGTAGTAGTGG-3'    |
| mus-Itga4     | forward, 5'-CCTCAGTGGTCAATCCTGGG-3';<br>reverse, 5'-CACAAGTCACGATAGAGCCATT-3'    |
| mus-Itgal     | forward, 5'-ACCAGGTCTTGACAGATTGAAG-3';<br>reverse, 5'-TGCTTGTTCCGGCAGTGATAGA-3'  |
| mus-Itgb1     | forward, 5'-ATGCCAAATCTTGCGGAGAAT-3';<br>reverse, 5'-TTTGCTGCGATTGGTGACATT-3'    |
| mus-Itgb2     | forward, 5'-CAGGAATGCACCAAGTACAAAGT-3';<br>reverse, 5'-GTCACAGCGCAAGGAGTCA-3'    |
| mus-Itgb7     | forward, 5'-AAACGGTGCTGCCCTTTGTAA-3';<br>reverse, 5'-CTCTCTCTCGAAGGCTTGAGC-3'    |
| mus-Ccl5      | forward, 5'-TTTGCCTACCTCTCCCTCG-3';<br>reverse, 5'-CGACTGCAAGATTGGAGCACT-3'      |
| mus-Ccl2      | forward, 5'-TAAAACCTGGATCGGAACCAAA-3';<br>reverse, 5'-GCATTAGCTTCAGATTTACGGGT-3' |
| mus-Cx3cl1    | forward, 5'-CTGGCCGCGTTCTTCCATT-3';<br>reverse, 5'-GCACATGATTCGCATTTTCGT-3'      |
| mus-Cxcl12    | forward, 5'-TGCATCAGTGACGGTAAACCA-3';<br>reverse, 5'-CACAGTTTGGAGTGTGAGGAT-3'    |
| mus-Icam1     | forward, 5'-GTGATGCTCAGGTATCCATCCA-3';<br>reverse, 5'-CACAGTTCTCAAAGCACAGCG-3'   |
| human-β-actin | forward, 5'-ATCTGGCACCACACCTTC-3';<br>reverse, 5'-AGCCAGGTCCAGACGCA-3'           |
| human-Enpp2   | forward, 5'-ACTTTTGCCGTTGGAGTCAAT-3';<br>reverse, 5'-GGAGTCTGATAGCACTGTAGGA-3'   |

**Table S3. The lipid profile and leukocyte profile in peripheral blood of WT and NSun2<sup>+/-</sup> mice.**

|                                       | <b>WT</b>           | <b>NSun2<sup>+/-</sup></b> |
|---------------------------------------|---------------------|----------------------------|
| <b>n</b>                              | <b>16</b>           | <b>16</b>                  |
| <b>Body weight (g)</b>                | <b>23.78 ± 0.47</b> | <b>20.75 ± 0.33 *</b>      |
| <b>Cholesterol (mmol/L)</b>           | <b>4.95 ± 0.14</b>  | <b>4.81 ± 0.17</b>         |
| <b>Triglycerides (mmol/L)</b>         | <b>1.49 ± 0.30</b>  | <b>1.49 ± 0.03</b>         |
| <b>Leukocyte (×10<sup>9</sup>/L)</b>  | <b>6.45 ± 0.64</b>  | <b>6.89 ± 0.68</b>         |
| <b>Lymphocyte (×10<sup>9</sup>/L)</b> | <b>4.71 ± 0.42</b>  | <b>5.58 ± 0.60</b>         |
| <b>Monocyte (×10<sup>9</sup>/L)</b>   | <b>0.17 ± 0.03</b>  | <b>0.25 ± 0.06</b>         |
| <b>Neutrophil (×10<sup>9</sup>/L)</b> | <b>0.30 ± 0.07</b>  | <b>0.28 ± 0.05</b>         |

Data shown are mean ± SEM. \**P*<0.05, by unpaired Student *t* test.
